# Supplementary material
Source: ML conference proceedings conference paper supplement (https://openreview.net/forum?id=syfWdclGE1)

Sample with Quantile Calibration (PICP: 0.865)

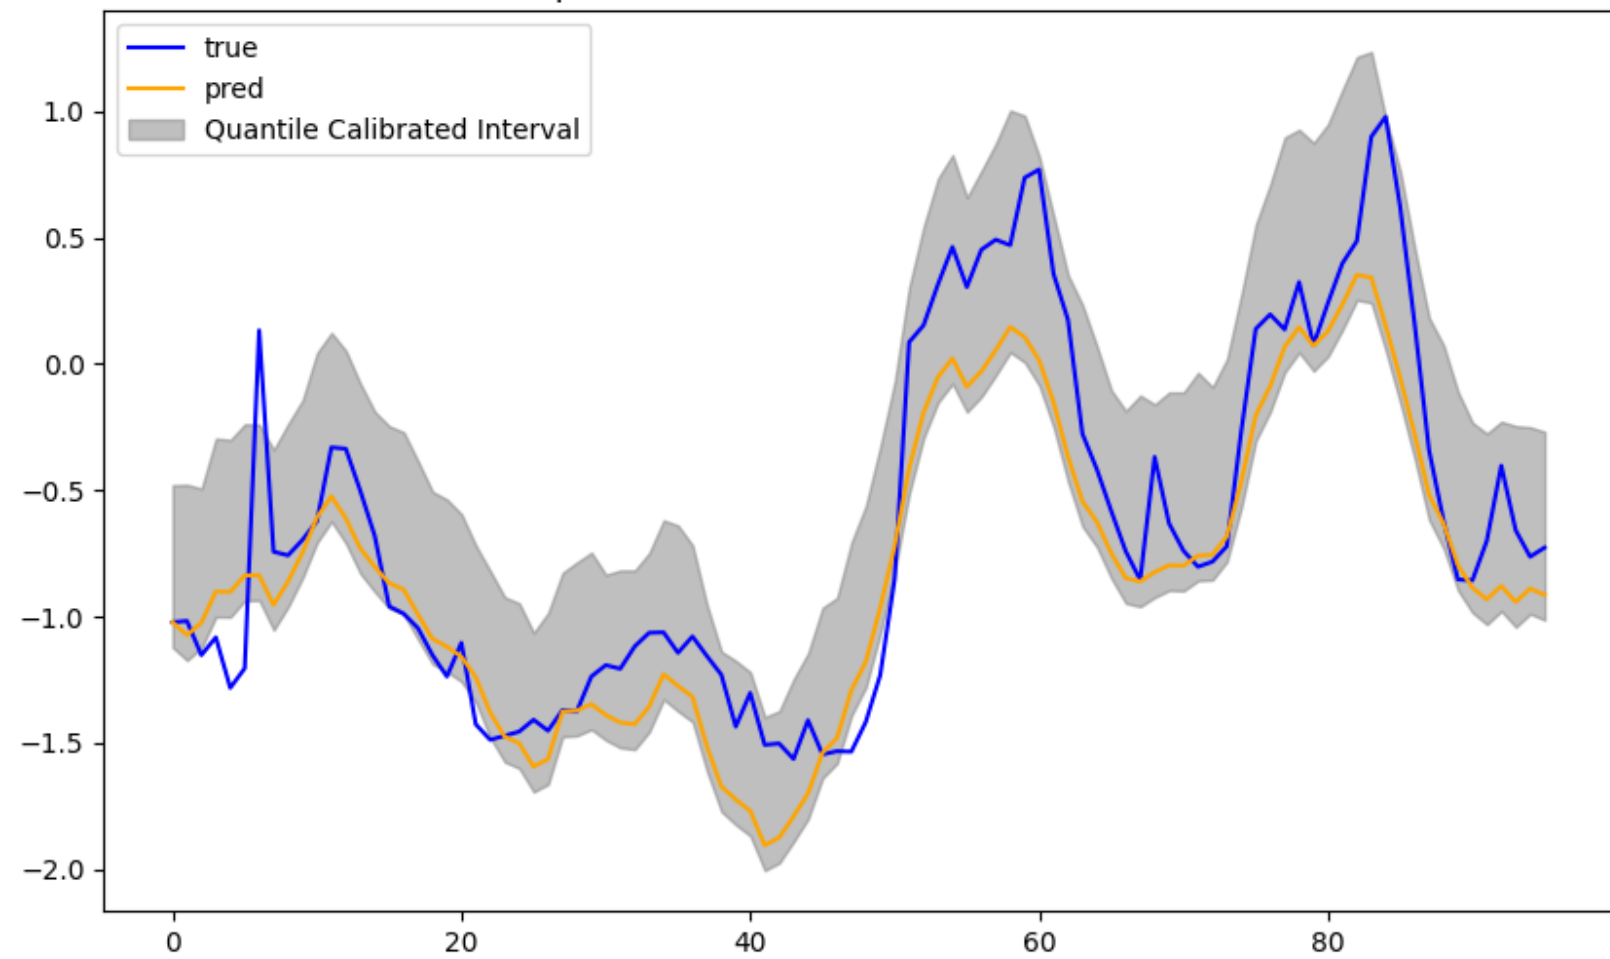

Supplement: supplementary_material [file 4978.pdf › AdaCali/Figs/QuanCali/4978.pdf]
